# Supplementary material for: Topological quantum phase transition in the magnetic semimetal HoSb
Source: Royal Society of Chemistry journal article supplement (doi:10.1039/d1tc01034d), 2021-01-01
Supplement: d1tc01034d1.pdf [file d1tc01034d1.pdf]

## Supplementary Information

### Topological quantum phase transition in the magnetic semimetal HoSb

J. -M. Zhang<sup>a,\*</sup>, F. Tang<sup>b,c</sup>, Y. -R. Ruan<sup>a,d</sup>, Y. Chen<sup>b</sup>, R. -W. Zhang<sup>e</sup>, W. -T. Guo<sup>a,d</sup>, S. -Y. Chen<sup>a,d</sup>, J. -P. Li<sup>f</sup>, W. Zhao<sup>g</sup>, W. Zhou<sup>b</sup>, L. Zhang<sup>b</sup>, Z. -D. Han<sup>b</sup>, B. Qian<sup>b</sup>, X. -F. Jiang<sup>b</sup>, Z. -G. Huang<sup>a,d</sup>, D. Qian<sup>h</sup>, and Y. Fang<sup>b,\*</sup>

<sup>a</sup>Fujian Provincial Key Laboratory of Quantum Manipulation and New Energy Materials, College of Physics and Energy, Fujian Normal University, Fuzhou 350117, China

<sup>b</sup>Jiangsu Laboratory of Advanced Functional Materials, Department of Physics, Changshu Institute of Technology, Changshu 215500, China

<sup>c</sup>Jiangsu Key Laboratory of Thin Films, School of Physical Science and Technology, Soochow University, Suzhou 215006, China

<sup>d</sup>Fujian Provincial Collaborative Innovation Center for Advanced High-Field Superconducting Materials and Engineering, Fuzhou, 350117, China

<sup>e</sup>Key Lab of advanced optoelectronic quantum architecture and measurement (MOE), Beijing Key Lab of Nanophotonics &

Ultrafine Optoelectronic Systems, and School of Physics, Beijing Institute of Technology, Beijing 100081, China

<sup>f</sup>Automotive & Transportation Engineering, Shenzhen Polytechnic, Shenzhen 518055, Guangdong, China

<sup>g</sup>ISEM, Innovation Campus, University of Wollongong, Wollongong, New South Wales 2500, Australia

<sup>h</sup>Key Laboratory of Artificial Structures and Quantum Control (Ministry of Education), Shenyang National Laboratory for Materials Science, School of Physics and Astronomy and Tsung-Dao Lee Institute, Shanghai Jiao Tong University, Shanghai 200240, China

\*<sup>1</sup>Author to whom correspondence should be addressed. Electronic mail: [jmzhang@fjnu.edu.cn](mailto:jmzhang@fjnu.edu.cn), and [fangyong@cslg.edu.cn](mailto:fangyong@cslg.edu.cn).

Figure S1 shows the angular magnetoresistance for HoSb at two representative temperatures 2 and 10 K where this compound is in the paramagnetic and antiferromagnetic states respectively. As displayed in Fig. S1(a), the angular magnetoresistance at 10 K simply follows a  $B|\cos\theta|$  function (not shown), which is widely observed in GdSb and ErBi<sup>1,2</sup>. In Fig. S1(b), a more complicated angle-dependent magnetoresistance is observed at 2 K. Thus, the spin orderings have significant effect on the angular magnetoresistance of HoSb.

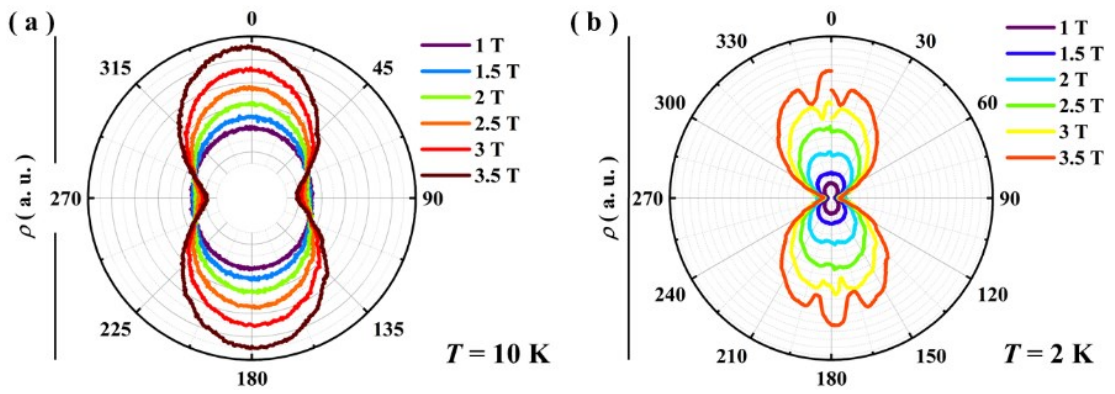

**Figure S1** (a)-(b) The angular magnetoresistance of HoSb single crystal at 10 and 2 K.

To clearly show the topological nature of the electronic properties for NM HoSb in Fig. 5(a), the Wilson loop (Wannier Charge Center) in the  $k_z = 0$  plane is calculated by GGA method, from which a nonzero topological invariant can be obtained.

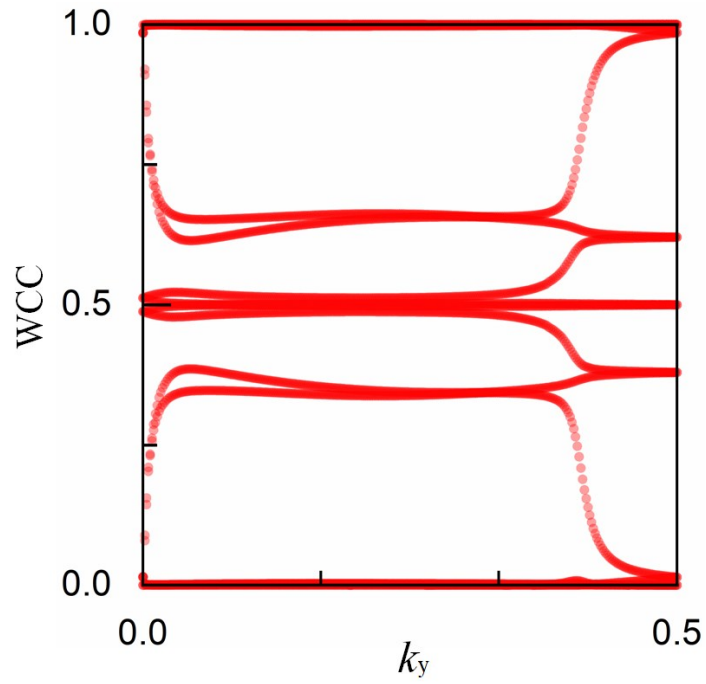

**Figure S2** Wannier charge centers for nonmagnetic HoSb.

## Reference

- [1] J. J. Song, F. Tang, W. Zhou, Y. Fang, H. L. Yu, Z. D. Han, B. Qian, X. F. Jiang, D. H. Wang and Y. W. Du, Extremely large magnetoresistance in the antiferromagnetic semimetal GdSb, *J. Mater. Chem. C*, 2018, **6**, 3026.
- [2] L. Y. Fan, F. Tang, W. Z. Meng, W. Zhao, L. Zhang, Z. D. Han, B. Qian, X. F. Jiang, X. M. Zhang and Y. Fang, Anisotropic and extreme magnetoresistance in the magnetic semimetal candidate erbium monobismuthide, *Phys. Rev. B*, 2020, **102**, 104417.
